# Supplementary material
Source: PubMed Central journal article supplement (PMC9765007)
Supplement: aac.00921-22-s0001.pdf [file aac.00921-22-s0001.pdf]

1 **Supplemental methods**

2 **Supplemental method M1: Purification of proteins**

3 Large-scale expression cultures of *E. coli* cells carrying expression plasmids of  
4 recombinant full-length *E. coli* GyrA, GyrB, ParC and ParE (T7 promoter, C-terminal  
5 6xHis tag) were grown separately using standard procedures (1-6 L). When cultures  
6 reached late log-phase, the incubation temperature was lowered to 18°C and protein  
7 expression was induced by adding IPTG to 1 mM, with growth continuing overnight. Cells  
8 were collected by centrifugation, resuspended in 5X volume of IMAC buffer A [50 mM  
9 Tris-HCl, pH 7.5; 300 mM NaCl; 2 mM MgCl<sub>2</sub>; 10% (v/v) glycerol; 1 mM TCEP]  
10 containing 15 mM imidazole, Benzonase<sup>®</sup> endonuclease (EMD Millipore) and protease  
11 inhibitors (cOmplete<sup>™</sup>, EDTA-free; Roche), and lysed by sonication. The total lysate was  
12 centrifuged to obtain the soluble lysate, which was applied to a column of Ni Sepharose  
13 FF (GE Healthcare Life Sciences) equilibrated with 6% (v/v) IMAC buffer B [50 mM Tris-  
14 HCl, pH 7.5; 300 mM NaCl; 2 mM MgCl<sub>2</sub>; 10% (v/v) glycerol; 1 mM TCEP; 250 mM  
15 imidazole]. The column was washed with the same buffer and developed with a linear  
16 gradient to 100% (v/v) IMAC buffer B over 20 column volumes. Fractions were analyzed  
17 by SDS-PAGE and pooled accordingly, concentrated, and applied to a Superdex 200 (GE  
18 Healthcare Life Sciences) size-exclusion column equilibrated with 50mM Tris-HCl, pH  
19 7.5; 50 mM KCl; 2 mM MgCl<sub>2</sub>; 10% (v/v) glycerol; 1 mM TCEP. Fractions were pooled  
20 based on analysis by SDS-PAGE, made to 2 mM spermidine, quantified by Bradford  
21 protein assay, aliquoted, flash-frozen in liquid nitrogen, and stored at -80°C for  
22 reconstitution prior to biochemical assay. *S. aureus* DNA gyrase enzyme and human

23 topoisomerase II alpha were purchased from TopoGen (Buena Vista, CO; TG2000H-2 and  
24 TG2000GSA-5).

25

## 26 **Supplemental method M2: Biochemical assays**

27 The *E. coli* and *S. aureus* GyrAB assay buffer contained 50 mM Tris HCl pH7.5, 10 mM  
28 MgCl<sub>2</sub>, 30 mM KCl, 10% glycerol, 0.005% BSA, 0.005% CHAPS, 75 mM ammonium  
29 acetate, 0.5 mM EDTA and 4 mM DTT. Tetramers of *E. coli* GyrA and GyrB for use in  
30 the assay were prepared by incubating 10 μM of each subunit in assay buffer for 60 minutes  
31 at room temperature.

32 The *E. coli* topoisomerase IV (ParCE) assay buffer contained 50 mM Tris HCl pH7.5, 10  
33 mM MgCl<sub>2</sub>, 50 mM KCl, 100 mM K-Glu, 1 mM EDTA, 0.01% Tween 20, 4 mM DTT and  
34 0.01% BSA. Tetramers of ParC and ParE for use in the assay were prepared by incubating  
35 10 μM of each subunit in assay buffer for 60 minutes at room temperature.

36 The human topoisomerase II alpha assay buffer contained 50 mM Tris HCl pH8, 10 mM  
37 MgCl<sub>2</sub>, 150 mM NaCl, 0.5 mM DTT and 0.003% BSA.

38 Compound stock solutions were diluted by 3.16-fold 8-point serial dilutions into a 384-  
39 well low dead volume microplate using the Bravo Liquid Handler with VWorks software  
40 (Agilent). A volume of 0.25 μL of each dilution was aliquoted onto 384-well  
41 polypropylene assay plates using the Echo 555 liquid handler with Tempo software  
42 (Labcyte). Using a Multidrop™ Combi (Thermo Fisher Scientific), 5 μL of enzyme and  
43 DNA substrate (see **Table S1**) were added to a 384-well assay plate containing 0.25 μL  
44 compound dilution or controls. Enzyme, DNA, and compound were pre-incubated for 30  
45 minutes at room temperature. Using a Multidrop™ Combi, 5 μL of ATP substrate (**Table**

46 **S1**) was added to initiate the reactions which were incubated at room temperature according  
 47 to the reaction times in **Table S1**. Using the Multidrop™ Combi, the reaction was quenched  
 48 with 50 µL per well 0.12% SDS (final concentration of SDS was 0.1%). The quenched  
 49 plate was sealed on the Agilent PlateLoc and the product was analyzed using size exclusion  
 50 chromatography.

51  
 52 **Table S1.** Integration parameters for supercoiled and relaxed DNA and decatenated DNA  
 53 SEC separation

| Assay                  | [Enzyme]<br>(final) | [DNA substrate]<br>(final) | [ATP]<br>(final) | Reaction time<br>(hours) |
|------------------------|---------------------|----------------------------|------------------|--------------------------|
| <i>E. coli</i> GyrAB   | 10 nM tetramer      | 40 <sup>a</sup>            | 1                | 2                        |
| <i>E. coli</i> ParCE   | 1.25 nM tetramer    | 10 <sup>b</sup>            | 1                | 1                        |
| <i>S. aureus</i> GyrAB | 100 nM tetramer     | 40 <sup>a</sup>            | 2                | 1                        |
| Human topo II alpha    | 1.3 nM              | 10 <sup>b</sup>            | 1                | 2                        |

54 <sup>a</sup>Relaxed DNA (TopoGEN TG2035-3)

55 <sup>b</sup>Kinetoplast DNA (TopoGEN TG2013-3)

56

57 DNA supercoiling mediated by GyrAB was measured by size exclusion chromatography  
 58 using an Agilent HPLC containing an 1100 well-plate autosampler (G1367A), 1100  
 59 autosampler chiller (G1330B), 1100 binary pump (G1312A), and a 1100 diode array  
 60 detector (G1315B) to acquire data. The instrument was controlled using the Agilent  
 61 ChemStation software (Revision B.0.03.02-SR2). A Waters Acquity BEH200 SEC column  
 62 (1.7 µm particle, 4.6 x 300 mm) was used to develop separation of supercoiled and relaxed  
 63 DNA with an isocratic flow using a mobile phase of 100 mM sodium phosphate, pH 6.8.  
 64 Injection volume was 10 µL and the autosampler temperature was held at 4°C (column  
 65 temperature was uncontrolled). The diode detector was set for 260 nm. This yielded good  
 66 resolution of supercoiled and relaxed DNA (30 second shift). The peak height was used  
 67 to calculate percent inhibition and IC<sub>50</sub> values by Helios software (1) according to a  
 68 previously described method (2) Guidelines for accurate EC<sub>50</sub>/IC<sub>50</sub> estimation.

69 Pharmaceutical Statistics; 10:128-134.). Geometric mean  $\pm$  standard error of the mean  
70 (SEM) were calculated using Excel software.

71 Decatenation mediated by *E. coli* ParCE or human topoisomerase II  $\alpha$  was measured  
72 using an Agilent capillary HPLC containing a 1200 capillary pump (G1367A), 1260 micro  
73 autosampler (G1377A), 1200 autosampler chiller (G1330B), and 1200 variable  
74 wavelength detector (G1314B) to acquire data. The instrument was controlled using the  
75 Agilent MassHunter Data Acquisition software (B.06.00, Build 6.0.6025.0). A Sepax  
76 Zenix SEC guard column (3  $\mu$ m particle, 4.6 x 50 mm) was used with a mobile phase of  
77 100 mM sodium phosphate, pH 6.8. The separation was developed with an isocratic flow  
78 of at 600  $\mu$ L/min for 7 minutes per sample. The injection volume was 8  $\mu$ L and the  
79 autosampler temperature was held at 4°C (column temperature uncontrolled) and the diode  
80 detector was set at 260 nm. Data were analyzed and integrated using Agilent MassHunter  
81 Qualitative Analysis software (B.06.00, build 6.0.633.0). UV chromatograms were  
82 extracted and only the decatenated kDNA peak was integrated using the parameters shown  
83 in **Table S2**. Manual integration was used to adjust integration in the event of additional  
84 peak integration. The area under the curve of decatenated kDNA was used to calculate  
85 the percent inhibition and the IC<sub>50</sub> values by Helios software (1). Geometric mean  $\pm$   
86 standard error of the mean (SEM) were calculated using Excel software.

87 **Table S2.** Integration parameters for concatenated and decatenated DNA SEC separation

| Time (min) | Event             | Value |
|------------|-------------------|-------|
| Initial    | Slope sensitivity | 0.1   |
| Initial    | Peak width        | 0.07  |
| Initial    | Area reject       | 0     |
| Initial    | Height reject     | 0     |
| Initial    | Shoulders         | Off   |
| 0          | Integration       | Off   |

| Time (min) | Event       | Value |
|------------|-------------|-------|
| 0.4        | Integration | On    |
| 0.75       | Integration | Off   |

88

89 **Supplemental method M3: Preparation of *S. aureus* ATCC29213 isogenic mutants**

90 *Selection of mutants encoding GyrA (S84L) in S. aureus ATCC29213:* Mueller Hinton agar  
91 (MHA) was melted then cooled to 50-60°C, and nadifloxain was added to 50 mL of media  
92 to concentrations of 0.0625-0.125 µg/mL. Media containing compound was then poured  
93 into large petri plates (Corning 430599, 150 mm x 25 mm) and allowed to solidify for at  
94 least one hour before plating of cells. *S. aureus* strain ATCC 29213 was streaked for  
95 isolation on MHA plates and incubated overnight at 37°C. The following day, cells were  
96 suspended in 5 mL of cation-adjusted Mueller Hinton broth (MHIIB) and this suspension  
97 was used to establish a 250 mL culture at 0.05 OD600 in a 1 L flask. The culture was then  
98 shaken at 220 rpm, 37°C, until it reached log phase at 0.5-0.6 OD600. The culture was split  
99 into four 50 mL conical tubes (Corning, 352070) and centrifuged at 6000 x g (4000 rpm,  
100 Sorvall) for 15 min at 4°C. The supernatant was removed, and each pellet was suspended  
101 in 1.15 mL of fresh MHIIB and combined into one 50 mL conical tube. Four hundred  
102 microliters of the suspension was spread onto each compound plate and allowed to dry.  
103 The plates were incubated at 37°C for up to 3 days to allow for the growth of resistant  
104 colonies

105 *Selection of mutants encoding GrlA (S80Y, S80F, and E84L) in S. aureus ATCC29213:*  
106 MHA was melted, cooled (50 -60°C), and norfloxacin was added to 50 mL of media to  
107 concentrations of 2-16 µg/mL. Media containing compound was then poured into large  
108 petri plates (Corning 430599, 150 mm x 25 mm) and allowed to solidify for at least one  
109 hour before plating of cells. *S. aureus* strain ATCC29213 was streaked for isolation on

110 MHIIB plates and incubated overnight at 37°C. The following day, cells were suspended  
111 in 5 mL of MHIIB; this suspension was used to establish a 250 mL culture at 0.05 OD600  
112 in a 1 L flask. The culture was shaken at 220 rpm, 37°C, until it reached log phase at 0.5-  
113 0.6 OD600. The culture was split into four 50 mL conical tubes (Corning, 352070) and  
114 centrifuged at 6000 x g (4000 rpm, Sorvall) for 15 min at 4°C. The supernatant was  
115 removed, and each pellet was suspended in 1.15 mL of fresh MHIIB and combined into  
116 one 50 mL conical tube. Four hundred microliters of the suspension was spread onto each  
117 compound plate and allowed to dry. The plates were incubated at 37°C for up to 3 days to  
118 allow for the growth of resistant colonies.

119 *Selection of mutants encoding GrlA (S80Y, S80F, E84L) in S. aureus NB01001-DRL0024:*  
120 MHA was melted, cooled (50-60 °C), and norfloxacin was added to 50 mL of media to  
121 concentrations of 2-16 µg/m. Media containing compound was then poured into large petri  
122 plates (Corning 430599, 150 mm x 25 mm) and allowed to solidify for at least one hour  
123 before plating of cells. *S. aureus* strain NB01001-DLR0024 was streaked for isolation on  
124 MHIIB plates and incubated overnight at 37°C. The following day, cells were suspended  
125 in 5 mL of MHIIB; this suspension was used to establish a 250 mL culture at 0.05 OD600  
126 in a 1 L flask. The culture was shaken at 220 rpm, 37°C, until it reached log phase at 0.5-  
127 0.6 OD600. The culture was split into four 50 mL conical tubes (Corning, 352070) and  
128 centrifuged at 6000 x g (4000 rpm, Sorvall) for 15 min at 4°C. The supernatant was  
129 removed, and each pellet was suspended in 1.15 mL of fresh MHIIB and combined into  
130 one 50 mL conical tube. Four hundred microliters of the suspension was spread onto each  
131 compound plate and allowed to dry. The plates were incubated at 37°C for up to 3 days to  
132 allow for the growth of resistant colonies.

133 *PCR amplification and sequencing of gyrA and grlA QRDRs:* The *gyrA* and *grlA* QRDR  
 134 regions were individually PCR amplified from spontaneous resistant mutants using the  
 135 primers listed in **Table S3**. The basic PCR parameters were 1 cycle at 95°C for 2 min, 55°C  
 136 for 30 sec, and 72°C for 2 min, followed by 35 cycles at 95°C for 10 sec, 55°C for 30 sec,  
 137 and 72°C for 1 min, and finishing with 1 cycle of 95°C for 10 sec, 55 °C for 30 sec, and 72  
 138 °C for 10 min. The PCR products were submitted for sequencing to Elim  
 139 Biopharmaceuticals, Incorporated (Hayward, CA) and sequencing analysis was performed  
 140 using Sequencher 5.0 software.

141 **Table S3. Oligonucleotide primers**

| Primer/Probe Name           | Sequence 5' - 3'           | Sequence            |
|-----------------------------|----------------------------|---------------------|
| <i>S. aureus</i> GyrA Ser84 |                            |                     |
| Forward                     | AGC ACG TAT CGT TGG TGA CG | <i>gyrA</i>         |
| Reverse                     | CCA TCT CCA TCC ATT GAA CC | <i>gyrA</i>         |
| <i>S. aureus</i> GrlA Ser80 |                            |                     |
| Forward                     | TCA AGT GGT AAT ACA CAC GA | <i>grlA</i>         |
| Reverse                     | GCG GAT CAT TAT CGA TAC TA | <i>grlA</i>         |
| <i>gyrA</i>                 |                            |                     |
| Forward                     | GAG TGT TAT CGT TGC TCG TG | QRDR of <i>gyrA</i> |
| Reverse                     | CCA TCT CCA TCC ATT GAA CC | QRDR of <i>gyrA</i> |
| <i>grlA</i> 12-Forward      | GAG TTT GGT ATG CAA GAG GA | QRDR of <i>grlA</i> |
| <i>grlA</i> 751-Reverse     | ACC AGT TGG AAA ATC AGG AC | QRDR of <i>grlA</i> |

142

143 **Supplemental method M4: Antibiotic susceptibility testing for *Chlamydomophila***  
 144 ***pneumoniae***

145 *C. pneumoniae* testing was performed on HEp-2 monolayers seeded on flat glass-bottom,  
 146 96-well plates. HEp-2 cells infected with 10 µL of *C. pneumoniae* (ATCC 53592) EB stock  
 147 to obtain approximately 40% infection. Infected cells were treated with the test compounds  
 148 dissolved in assay medium consisted of Eagle's Minimum Essential Medium (Corning;

149 Manassas, VA) with 1.5 g/L sodium bicarbonate, nonessential amino acids, L-glutamine,  
150 and sodium pyruvate supplemented with 10% fetal bovine serum (Corning) and 10 µg/mL  
151 cycloheximide (Sigma-Aldrich), containing 2-fold serial dilution of antibiotics, at 35°C in  
152 a humidified atmosphere with 5% CO<sub>2</sub> for 72 hours. *C. pneumoniae* inclusions were then  
153 fixed with 100% methanol for 10 minutes before staining. A commercially available kit,  
154 containing FITC-Chlamydia LPS antibody and Evan's Blue protein staining dye  
155 (Pathfinder Chlamydia Culture Confirmation System, Bio-Rad, Redmond, WA) was used  
156 for staining *C. pneumoniae* inclusions following the manufacturer directions. Hoechst  
157 33342 DNA staining dye (Thermo Fisher Scientific) was added to each well and plates  
158 were incubated for an additional 30 minutes at room temperature. Fluorescence microscopy  
159 image acquisition was performed on an ImageXpress Micro XLS widefield high-content  
160 analysis system (139130, Molecular Devices) using MetaXpress High Content Image  
161 Acquisition & Analysis Software (Version 5.0). Images were captured at 40X  
162 magnification, using the transmitted light, FITC, DAPI, and Texas Red channel settings to  
163 obtain images. The total number of HEp-2 cells, infected and uninfected, was measured  
164 using the image acquired on the DAPI channel. HEp-2 nuclei, stained with Hoechst DNA  
165 staining dye (excitation wavelength, 350 nm; emission wavelength, 461 nm), possessing a  
166 diameter between 10 to 20 µm, were counted as a cell. The total number of *C. pneumoniae*  
167 inclusions was measured using the image acquired on the FITC channel. *C. pneumoniae*  
168 inclusions, labeled with FITC-Chlamydia LPS antibody (excitation wavelength, 495 nm;  
169 emission wavelength, 519 nm), possessing a diameter between 3 and 15 µm were counted  
170 as an inclusion. Infection forming particles can form multiple inclusions in a cell. Percent  
171 infection was calculated as the number of *C. pneumoniae* inclusions per one hundred HEp-



172 2 cells. This counting method did not distinguish between a single inclusion per HEp-2  
 173 cell, or multiple inclusions in a single cell. Specified coordinate fields were sampled, and  
 174 counts of HEp-2 cells and *C. pneumoniae* inclusions were used to calculate percent  
 175 infection per field. MIC value was defined as the lowest concentration of antibiotic that  
 176 yielded a sample mean of less than 10% infected cells, within a 95% confidence interval.  
 177

178 **Supplemental results**

179

180 **Figure R1. Scattergram of levofloxacin MIC and CUO246 MIC against *S. aureus***  
 181 **(n=40)**  
 182

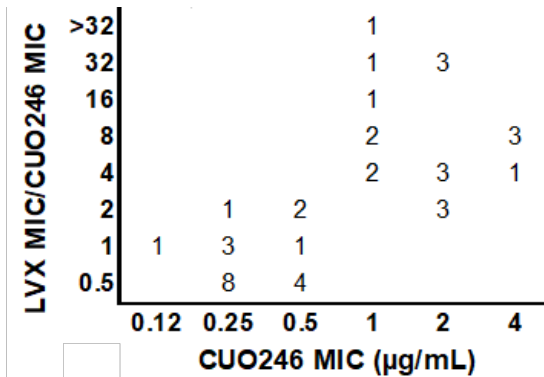

183

184

185

186 **Table R1. MIC (µg/mL) of CUO246 against *S. aureus* with variations to *in vitro* testing**  
 187 **parameters**

188

| Test variable            | CUO246 MIC (µg/mL) |            |         |          |
|--------------------------|--------------------|------------|---------|----------|
|                          | ATCC 29213         | ATCC 33591 | NB01058 | BAA-1717 |
| Reference                | 0.25-0.5           | 0.25-0.5   | 2-4     | 0.25-0.5 |
| 10% human serum          | 0.12               | 0.12       | 1       | 0.12     |
| 50% human serum          | 0.25               | 0.25       | 2       | 0.25     |
| 1% surfactant            | 0.25               | 0.25       | 4       | 0.25     |
| 5% surfactant            | 0.25               | 0.25       | 2       | 0.25     |
| Unadjusted MHB           | 0.5                | 0.25       | 4       | 0.5      |
| CAMHB, fresh             | 0.12               | 0.12       | 2       | 0.12     |
| 5% LHB supplement        | 1                  | 1          | 2       | 0.25     |
| pH 6.4                   | 0.5                | 0.5        | 2       | 0.25     |
| pH 8.4                   | 0.25               | 0.5        | 4       | 0.5      |
| 50 mg/L Ca <sup>2+</sup> | 0.25               | 0.25       | 4       | 0.5      |

| Test variable       | CUO246 MIC ( $\mu\text{g/mL}$ ) |            |         |          |
|---------------------|---------------------------------|------------|---------|----------|
|                     | ATCC 29213                      | ATCC 33591 | NB01058 | BAA-1717 |
| 5% NaCl supplement  | 1                               | 0.5        | 4       | 0.5      |
| 48 hr incubation    | <b>2</b>                        | 1          | 8       | <b>2</b> |
| 5% CO <sub>2</sub>  | 0.25                            | 0.25       | 2       | 0.25     |
| Microaerobic        | 0.25                            | 0.25       | 2       | 0.25     |
| Anaerobic           | 0.25                            | 0.5        | 2       | 0.25     |
| Low inoculum        | 0.5                             | 0.5        | 4       | 1        |
| High inoculum       | 0.5                             | 0.5        | 4       | 1        |
| Aged plate inoculum | 0.5                             | 0.5        | 4       | 1        |
| Log-phase inoculum  | 0.5                             | 1          | 4       | 1        |

189 Bold values indicate a  $\geq 4$ -fold from reference MIC values

190 **REFERENCES**

- 191 1. Gubler H, Clare N, Galafassi L, Geissler U, Girod M, Herr G. 2018. Helios:  
192 History and Anatomy of a Successful In-House Enterprise High-Throughput  
193 Screening and Profiling Data Analysis System. SLAS Discov;23(5):474-488.
- 194 2. Sebaugh JL. 2011. Guidelines for accurate EC50/IC50 estimation. Pharm Stat.  
195 10(2);128-34.
